# Supplementary material for: Characterization of wheat (Triticum aestivum) TIFY family and role of Triticum Durum TdTIFY11a in salt stress tolerance
Source: PLOS journal article supplement (doi:10.1371/journal.pone.0200566), 2018-07-18
Supplement: S2 (10.1371/journal.pone.0200566.s002) [file journal.pone.0200566.s002]

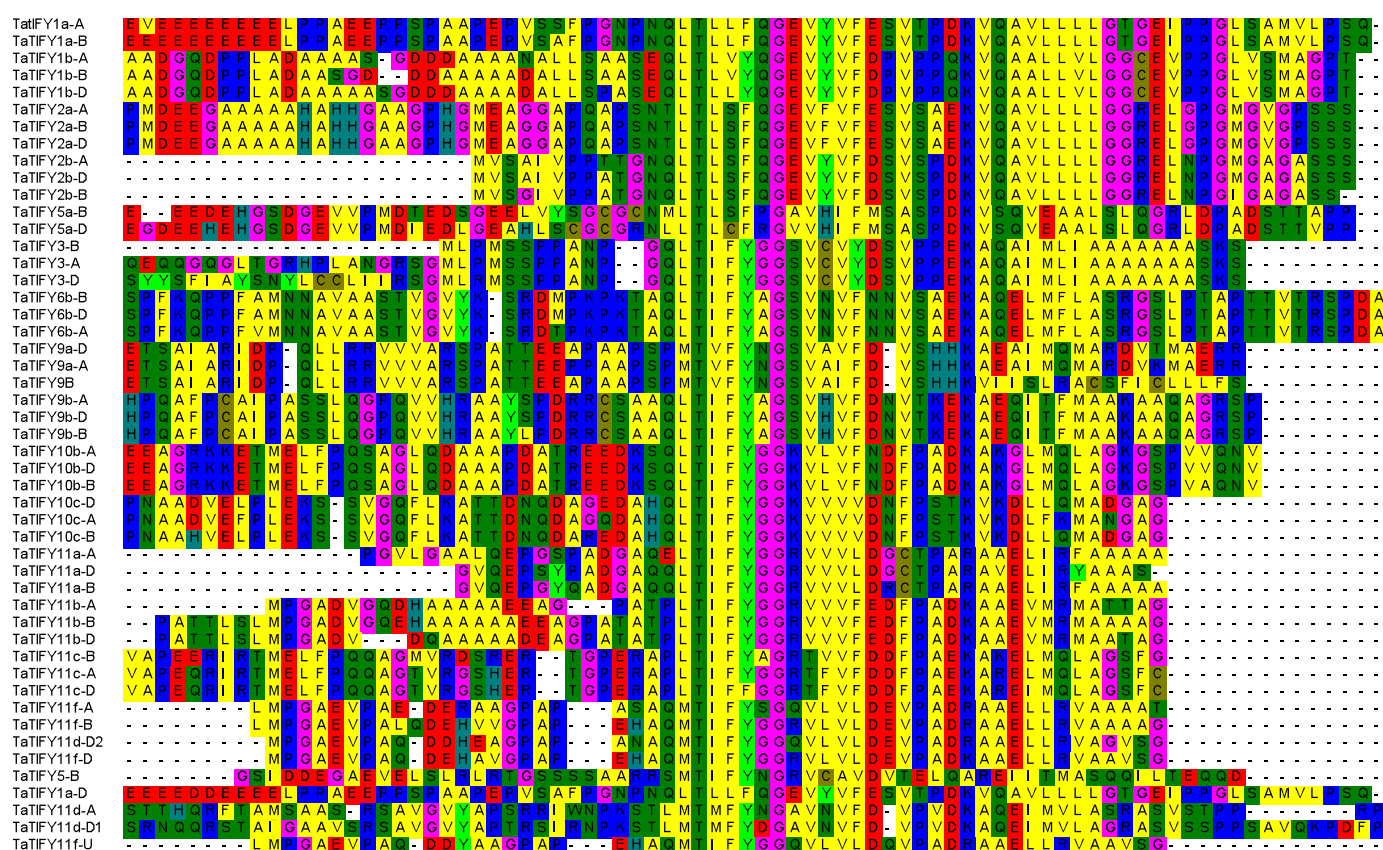

**Supplementary Figure S1. Multiple sequence alignment of the conserved TIFY domain of several wheat TIFY proteins.**

Alignment of the 49 *Triticum aestivum* TIFY proteins showing the conserved TIFY domain. Protein IDs indicated are the same as listed in Table 1. The alignment was performed with MEGA6.06 using CLUSTALW and the BLOSUM matrix.
